# Supplementary material for: Structure versatility of coordination polymers constructed from a semirigid ligand and polynuclear metal clusters
Source: Royal Society of Chemistry journal article supplement (doi:10.1039/c4ce01032a), 2014-01-01
Supplement: c4ce01032a1.pdf [file c4ce01032a1.pdf]

## Supporting information

### Structure Versatility of Coordination Polymers Constructed from a New Semirigid Polycarboxylate Ligand and Polynuclear Metal Clusters

De-Liang Yang,<sup>a</sup> Xin Zhang,<sup>a</sup> Yuan-Gen Yao,<sup>a \*</sup> and Jian Zhang <sup>a</sup>

<sup>a</sup>Key Laboratory of Coal to Ethylene Glycol and Its Related Technology, Fujian Institute of Research on the Structure of Matter, Chinese Academy of Sciences, Fuzhou, Fujian 350002, China

E-mail: yyg@fjirsm.ac.cn; Fax: +86-591-8371-4946; Tel: +86-591-8371-1523

**Table S1** Selected bond lengths (Å) and angles (°) for **1–5<sup>a</sup>**.

| <b>Compound 1</b>   |            |                      |            |
|---------------------|------------|----------------------|------------|
| Cd(1)-O(1W)         | 2.210(5)   | Cd(1)-O(6)#1         | 2.246(4)   |
| Cd(1)-O(2)          | 2.333(4)   | Cd(1)-O(13)          | 2.405(5)   |
| Cd(1)-O(7)#1        | 2.484(5)   | Cd(1)-O(1)           | 2.492(5)   |
| Cd(1)-O(4b)         | 2.591(3)   | Cd(2)-O(7)a          | 2.234(3)   |
| Cd(1)-O(12)         | 2.494(5)   | Cd(2)-O(18)#2        | 2.205(5)   |
| Cd(2)-O(9)#3        | 2.290(5)   | Cd(2)-O(11)          | 2.348(5)   |
| Cd(2)-O(10)         | 2.464(4)   | Cd(2)-O(4)           | 2.486(5)   |
| Cd(2)-O(3)          | 2.512(6)   | Cd(2)-O(17)#2        | 2.540(5)   |
| Cd(3)-O(8)#3        | 2.155(5)   | Cd(3)-O(12)          | 2.225(4)   |
| Cd(3)-O(16)#4       | 2.264(5)   | Cd(3)-O(2)           | 2.265(5)   |
| Cd(3)-O(4)          | 2.276(5)   | Cd(3)-O(10)          | 2.374(4)   |
| O(1W)-Cd(1)-O(6)#1  | 98.79(19)  | O(1W)-Cd(1)-O(2)     | 96.35(18)  |
| O(6)#1-Cd(1)-O(2)   | 159.80(17) | O(1W)-Cd(1)-O(13)    | 89.1(2)    |
| O(6)#1-Cd(1)-O(13)  | 99.90(17)  | O(2)-Cd(1)-O(13)     | 93.62(15)  |
| O(1W)-Cd(1)-O(7)#1  | 143.4(2)   | O(6)#1-Cd(1)-O(7)#1  | 54.63(16)  |
| O(2)-Cd(1)-O(7)#1   | 105.70(15) | O(13)-Cd(1)-O(7)#1   | 117.62(18) |
| O(1W)-Cd(1)-O(1)    | 83.7(2)    | O(6)#1-Cd(1)-O(1)    | 114.69(17) |
| O(2)-Cd(1)-O(1)     | 53.88(15)  | O(13)-Cd(1)-O(1)     | 145.33(15) |
| O(7)#1-Cd(1)-O(1)   | 86.15(16)  | O(1W)-Cd(1)-O(12)    | 139.3(2)   |
| O(6)#1-Cd(1)-O(12)  | 100.57(16) | O(2)-Cd(1)-O(12)     | 75.92(14)  |
| O(13)-Cd(1)-O(12)   | 52.51(16)  | O(7)#1-Cd(1)-O(12)   | 75.46(16)  |
| O(1)-Cd(1)-O(12)    | 118.95(15) | O(18)#2-Cd(2)-O(9)#3 | 96.58(18)  |
| O(18)#2-Cd(2)-O(11) | 119.51(19) | O(9)#3-Cd(2)-O(11)   | 86.96(18)  |

---

|                       |            |                      |            |
|-----------------------|------------|----------------------|------------|
| O(18)#2-Cd(2)-O(10)   | 159.38(18) | O(9)#3-Cd(2)-O(10)   | 102.37(15) |
| O(11)-Cd(2)-O(10)     | 54.34(15)  | O(18)#2-Cd(2)-O(4)   | 111.78(18) |
| O(9)#3-Cd(2)-O(4)     | 81.72(17)  | O(11)-Cd(2)-O(4)     | 128.38(15) |
| O(10)-Cd(2)-O(4)      | 79.27(14)  | O(18)#2-Cd(2)-O(3)   | 95.79(19)  |
| O(9)#3-Cd(2)-O(3)     | 133.50(17) | O(11)-Cd(2)-O(3)     | 124.00(18) |
| O(10)-Cd(2)-O(3)      | 77.00(15)  | O(4)-Cd(2)-O(3)      | 52.13(16)  |
| O(18)#2-Cd(2)-O(17)#2 | 54.31(18)  | O(9)#3-Cd(2)-O(17)#2 | 144.42(17) |
| O(11)-Cd(2)-O(17)#2   | 90.93(17)  | O(10)-Cd(2)-O(17)#2  | 105.07(15) |
| O(4)-Cd(2)-O(17)#2    | 125.30(17) | O(3)-Cd(2)-O(17)#2   | 75.30(17)  |
| O(8)#3-Cd(3)-O(12)    | 100.90(17) | O(8)#3-Cd(3)-O(16)#4 | 95.0(2)    |
| O(12)-Cd(3)-O(16)#4   | 99.16(17)  | O(8)#3-Cd(3)-O(2)    | 171.29(17) |
| O(12)-Cd(3)-O(2)      | 82.89(16)  | O(16)#4-Cd(3)-O(2)   | 92.07(18)  |
| O(8)#3-Cd(3)-O(4)     | 92.50(17)  | O(12)-Cd(3)-O(4)     | 159.32(18) |
| O(16)#4-Cd(3)-O(4)    | 95.23(19)  | O(2)-Cd(3)-O(4)      | 81.82(16)  |
| O(8)#3-Cd(3)-O(10)    | 86.63(18)  | O(12)-Cd(3)-O(10)    | 79.70(15)  |
| O(16)#4-Cd(3)-O(10)   | 178.15(18) | O(2)-Cd(3)-O(10)     | 86.35(16)  |
| O(4)-Cd(3)-O(10)      | 85.50(17)  |                      |            |

**Compound 2**

|                     |            |                     |            |
|---------------------|------------|---------------------|------------|
| Cd(1)-O(1)          | 2.202(3)   | Cd(1)-O(7)#1        | 2.242(3)   |
| Cd(1)-O(4)#2        | 2.245(3)   | Cd(1)-O(8)#3        | 2.301(3)   |
| Cd(1)-O(9)#3        | 2.458(3)   | Cd(1)-O(3)#2        | 2.736(3)   |
| Cd(1)-O(6)#1        | 2.807(3)   | Ca(1)-O(11)         | 2.285(3)   |
| Ca(1)-O(6)#1        | 2.289(3)   | Ca(1)-O(10)         | 2.330(4)   |
| Ca(1)-O(3)#4        | 2.333(3)   | Ca(1)-O(2)          | 2.345(3)   |
| Ca(1)-O(9)#3        | 2.419(3)   | O(1)-Cd(1)-O(7)#1   | 102.22(12) |
| O(1)-Cd(1)-O(4)#2   | 107.33(11) | O(7)#1-Cd(1)-O(4)#2 | 84.63(12)  |
| O(1)-Cd(1)-O(8)#3   | 100.82(12) | O(7)#1-Cd(1)-O(8)#3 | 156.55(12) |
| O(4)#2-Cd(1)-O(8)#3 | 92.68(12)  | O(1)-Cd(1)-O(9)#3   | 112.99(10) |
| O(7)#1-Cd(1)-O(9)#3 | 110.74(11) | O(4)#2-Cd(1)-O(9)#3 | 131.73(10) |
| O(8)#3-Cd(1)-O(9)#3 | 55.13(10)  | O(1)-Cd(1)-O(6)#1   | 89.92(10)  |
| O(7)#1-Cd(1)-O(6)#1 | 50.19(11)  | O(8)#3-Cd(1)-O(6)#1 | 125.82(11) |
| O(4)#2-Cd(1)-O(6)#1 | 134.48(9)  | O(9)#3-Cd(1)-O(6)#1 | 71.67(10)  |
| O(3)#2-Cd(1)-O(6)#1 | 106.68(9)  | O(1)-Cd(1)-O(3)#2   | 159.08(10) |
| O(7)#1-Cd(1)-O(3)#2 | 80.04(11)  | O(4)#2-Cd(1)-O(3)#2 | 51.88(9)   |
| O(8)#3-Cd(1)-O(3)#2 | 80.03(10)  | O(9)#3-Cd(1)-O(3)#2 | 84.87(9)   |
| O(11)-Ca(1)-O(6)#1  | 174.86(15) | O(11)-Ca(1)-O(10)   | 95.44(16)  |
| O(2)-Ca(1)-O(9)#3   | 89.58(14)  | O(11)-Ca(1)-O(3)#4  | 88.13(13)  |
| O(6)#1-Ca(1)-O(3)#4 | 92.49(12)  | O(10)-Ca(1)-O(3)#4  | 95.47(13)  |
| O(11)-Ca(1)-O(2)    | 93.79(13)  | O(6)#1-Ca(1)-O(2)   | 85.67(12)  |
| O(10)-Ca(1)-O(2)    | 83.55(13)  | O(3)#4-Ca(1)-O(2)   | 177.92(12) |
| O(11)-Ca(1)-O(9)#3  | 92.68(14)  | O(6)#1-Ca(1)-O(9)#3 | 82.19(11)  |
| O(10)-Ca(1)-O(9)#3  | 163.18(12) | O(3)#4-Ca(1)-O(9)#3 | 99.50(11)  |
| O(2)-Ca(1)-O(9)#3   | 81.23(11)  |                     |            |

---

---

| <b>Compound 3</b>   |            |                     |            |
|---------------------|------------|---------------------|------------|
| Cd(1)-O(1)          | 2.239(3)   | Cd(1)-O(4)#1        | 2.268(2)   |
| Cd(1)-O(7)#2        | 2.354(2)   | Cd(1)-O(9)#3        | 2.375(3)   |
| Cd(1)-O(6)#2        | 2.380(2)   | Cd(1)-O(8)#3        | 2.454(3)   |
| Cd(1)-O(5)#1        | 2.711(2)   | Ca(1)-O(1W)         | 2.388(3)   |
| Ca(1)-O(5)#1        | 2.334(3)   | Ca(1)-O(9)          | 2.352(3)   |
| Ca(1)-O(10)         | 2.352(3)   | Ca(1)-O(2W)         | 2.420(3)   |
| Ca(1)-O(2)#3        | 2.325(3)   | O(7)#2-Cd(1)-O(6)#2 | 54.45(9)   |
| O(1)-Cd(1)-O(4)#1   | 103.52(10) | O(9)#3-Cd(1)-O(6)#2 | 103.86(9)  |
| O(1)-Cd(1)-O(7)#2   | 119.55(11) | O(1)-Cd(1)-O(8)#3   | 137.81(9)  |
| O(4)#1-Cd(1)-O(7)#2 | 77.27(9)   | O(4)#1-Cd(1)-O(8)#3 | 87.81(11)  |
| O(4)#1-Cd(1)-O(6)#2 | 86.70(10)  | O(6)#2-Cd(1)-O(8)#3 | 109.37(10) |
| O(4)#1-Cd(1)-O(9)#3 | 122.55(9)  | O(9)#3-Cd(1)-O(8)#3 | 54.25(9)   |
| O(7)#2-Cd(1)-O(9)#3 | 144.26(10) | O(7)#2-Cd(1)-O(8)#3 | 102.52(10) |
| O(1)-Cd(1)-O(6)#2   | 93.69(10)  | O(1)-Cd(1)-O(5)#1   | 75.74(9)   |
| O(1)-Cd(1)-O(9)#3   | 130.84(9)  | O(4)#1-Cd(1)-O(5)#1 | 51.50(7)   |
| O(7)#2-Cd(1)-O(5)#1 | 128.69(7)  | O(9)#3-Cd(1)-O(5)#1 | 78.44(7)   |
| O(8)#3-Cd(1)-O(5)#1 | 80.72(9)   | O(6)#2-Cd(1)-O(5)#1 | 169.12(7)  |
| O(2)#3-Ca(1)-O(5)#1 | 81.03(10)  | O(10)-Ca(1)-O(1W)   | 83.81(13)  |
| O(2)#3-Ca(1)-O(10)  | 115.77(12) | O(9)-Ca(1)-O(1W)    | 105.79(11) |
| O(5)#1-Ca(1)-O(10)  | 155.94(11) | O(2)#3-Ca(1)-O(2W)  | 83.33(11)  |
| O(2)#3-Ca(1)-O(9)   | 79.32(9)   | O(5)#1-Ca(1)-O(2W)  | 95.15(10)  |
| O(5)#1-Ca(1)-O(1W)  | 80.25(12)  | O(10)-Ca(1)-O(2W)   | 71.36(12)  |
| O(10)-Ca(1)-O(9)    | 80.30(11)  | O(9)-Ca(1)-O(2W)    | 135.84(11) |
| O(2)#3-Ca(1)-O(1W)  | 160.41(11) | O(1W)-Ca(1)-O(2W)   | 104.04(12) |
| O(5)#1-Ca(1)-O(9)   | 121.37(9)  |                     |            |

| <b>Compound 4</b>     |            |                     |           |
|-----------------------|------------|---------------------|-----------|
| Ba(1)-O(10)#1         | 2.731(3)   | Ba(1)-O(21)         | 2.763(3)  |
| Ba(1)-O(20)#2         | 2.779(3)   | Ba(1)-O(16)         | 2.799(3)  |
| Ba(1)-O(6)#3          | 2.809(3)   | Ba(1)-O(17)         | 2.843(3)  |
| Ba(1)-O(3)#4          | 2.853(3)   | Ba(1)-O(2W)         | 2.880(3)  |
| Ba(1)-O(17)#2         | 3.069(3)   | Ba(2)-O(18)#2       | 2.722(3)  |
| Ba(2)-O(12)           | 2.743(3)   | Ba(2)-O(2)#5        | 2.749(3)  |
| Ba(2)-O(9)            | 2.759(3)   | Ba(2)-O(2W)#2       | 2.781(3)  |
| Ba(2)-O(1W)           | 2.834(3)   | Ba(2)-O(16)         | 3.006(3)  |
| Ba(2)-O(20)           | 3.038(3)   | Ba(2)-O(17)#2       | 3.046(3)  |
| O(10)#1-Ba(1)-O(21)   | 132.81(11) | O(6)#3-Ba(1)-O(3)#4 | 101.61(9) |
| O(10)#1-Ba(1)-O(20)#2 | 131.67(9)  | O(17)-Ba(1)-O(3)#4  | 127.57(9) |
| O(21)-Ba(1)-O(20)#2   | 88.82(10)  | O(20)#2-Ba(1)-O(2W) | 65.09(9)  |
| O(10)#1-Ba(1)-O(16)   | 78.14(9)   | O(21)-Ba(1)-O(2W)   | 131.06(9) |

---

---

|                      |            |                       |            |
|----------------------|------------|-----------------------|------------|
| O(21)-Ba(1)-O(16)    | 102.64(9)  | O(10)#1-Ba(1)-O(2W)   | 68.64(8)   |
| O(20)#2-Ba(1)-O(16)  | 121.45(8)  | O(6)#3-Ba(1)-O(2W)    | 126.27(8)  |
| O(10)#1-Ba(1)-O(6)#3 | 68.32(10)  | O(16)-Ba(1)-O(2W)     | 125.63(9)  |
| O(21)-Ba(1)-O(6)#3   | 69.22(11)  | O(16)-Ba(1)-O(2W)     | 69.91(8)   |
| O(20)#2-Ba(1)-O(6)#3 | 158.03(9)  | O(10)#1-Ba(1)-O(17)#2 | 66.49(9)   |
| O(16)-Ba(1)-O(6)#3   | 66.33(8)   | O(21)-Ba(1)-O(17)#2   | 138.35(9)  |
| O(10)#1-Ba(1)-O(17)  | 80.63(10)  | O(20)#2-Ba(1)-O(17)#2 | 75.57(10)  |
| O(21)-Ba(1)-O(17)    | 143.77(10) | O(16)-Ba(1)-O(17)#2   | 63.64(8)   |
| O(20)#2-Ba(1)-O(17)  | 71.08(8)   | O(6)#3-Ba(1)-O(17)#2  | 109.08(9)  |
| O(16)-Ba(1)-O(17)    | 66.45(8)   | O(17)-Ba(1)-O(17)#2   | 68.56(10)  |
| O(6)#3-Ba(1)-O(17)   | 66.99(8)   | O(3)#4-Ba(1)-O(17)#2  | 115.68(8)  |
| O(10)#1-Ba(1)-O(3)#4 | 105.16(10) | O(2W)-Ba(1)-O(17)#2   | 124.14(8)  |
| O(21)-Ba(1)-O(3)#4   | 64.73(10)  | O(20)#2-Ba(1)-O(3)#4  | 64.37(8)   |
| O(16)-Ba(1)-O(3)#4   | 127.42(8)  | O(18)#2-Ba(2)-O(12)   | 152.48(9)  |
| O(9)-Ba(2)-O(1W)     | 66.40(10)  | O(18)#2-Ba(2)-O(2)#5  | 138.74(10) |
| O(2W)#2-Ba(2)-O(1W)  | 142.54(10) | O(12)-Ba(2)-O(2)#5    | 68.73(8)   |
| O(18)#2-Ba(2)-O(16)  | 104.84(9)  | O(18)#2-Ba(2)-O(9)    | 99.91(9)   |
| O(12)-Ba(2)-O(16)    | 69.13(8)   | O(12)-Ba(2)-O(9)      | 67.02(9)   |
| O(2)#5-Ba(2)-O(16)   | 92.05(8)   | O(2)#5-Ba(2)-O(9)     | 99.70(9)   |
| O(9)-Ba(2)-O(16)     | 126.13(8)  | O(18)#2-Ba(2)-O(2W)#2 | 68.42(9)   |
| O(2W)#2-Ba(2)-O(16)  | 104.54(8)  | O(12)-Ba(2)-O(2W)#2   | 138.84(8)  |
| O(1W)-Ba(2)-O(16)    | 74.60(9)   | O(2)#5-Ba(2)-O(2W)#2  | 71.00(9)   |
| O(18)#2-Ba(2)-O(20)  | 106.09(9)  | O(9)-Ba(2)-O(2W)#2    | 129.07(9)  |
| O(12)-Ba(2)-O(20)    | 87.68(8)   | O(18)#2-Ba(2)-O(1W)   | 75.57(10)  |
| O(2)#5-Ba(2)-O(20)   | 62.66(8)   | O(12)-Ba(2)-O(1W)     | 76.96(9)   |
| O(16)-Ba(2)-O(20)    | 42.65(7)   | O(2)#5-Ba(2)-O(1W)    | 145.68(10) |
| O(2W)#2-Ba(2)-O(20)  | 66.34(8)   | O(18)#2-Ba(2)-O(17)#2 | 45.09(8)   |
| O(1W)-Ba(2)-O(20)    | 116.31(9)  | O(12)-Ba(2)-O(17)#2   | 129.98(8)  |
| O(9)-Ba(2)-O(20)     | 153.71(8)  | O(2W)#2-Ba(2)-O(17)#2 | 68.30(8)   |
| O(1W)-Ba(2)-O(17)#2  | 79.22(9)   | O(9)-Ba(2)-O(17)#2    | 137.22(8)  |
| O(20)-Ba(2)-O(17)#2  | 64.98(7)   | O(2)#5-Ba(2)-O(17)#2  | 122.78(8)  |
| O(16)-Ba(2)-O(17)#2  | 62.37(8)   |                       |            |

**Compound 5**

---

|                    |            |                     |           |
|--------------------|------------|---------------------|-----------|
| Ba(1)-O(2)#1       | 2.733(4)   | Ba(1)-O(19)         | 2.749(5)  |
| Ba(1)-O(13)#2      | 2.782(4)   | Ba(1)-O(12)         | 2.793(4)  |
| Ba(1)-O(8)#3       | 2.814(4)   | Ba(1)-O(2W)         | 2.824(4)  |
| Ba(1)-O(7)#4       | 2.861(5)   | Ba(1)-O(11)         | 2.880(5)  |
| Ba(1)-O(11)#2      | 3.061(4)   | Ba(2)-O(10)         | 2.725(4)  |
| Ba(2)-O(4)         | 2.740(4)   | Ba(2)-O(1)          | 2.741(4)  |
| Ba(2)-O(16)#5      | 2.745(4)   | Ba(2)-O(11)         | 2.774(4)  |
| Ba(2)-O(1W)        | 2.840(5)   | Ba(2)-O(12)#2       | 3.005(4)  |
| Ba(2)-O(13)#2      | 3.006(4)   | Ba(2)-O(2W)         | 3.055(4)  |
| O(2)#1-Ba(1)-O(19) | 134.05(16) | O(13)#2-Ba(1)-O(11) | 71.10(12) |

---

|                       |            |                       |            |
|-----------------------|------------|-----------------------|------------|
| O(2)#1-Ba(1)-O(13)#2  | 132.78(13) | O(12)-Ba(1)-O(11)     | 66.68(12)  |
| O(19)-Ba(1)-O(13)#2   | 87.59(14)  | O(8)#3-Ba(1)-O(11)    | 128.58(13) |
| O(2)#1-Ba(1)-O(12)    | 77.84(13)  | O(2)#1-Ba(1)-O(7)#4   | 106.47(14) |
| O(19)-Ba(1)-O(12)     | 100.75(14) | O(19)-Ba(1)-O(7)#4    | 65.56(15)  |
| O(19)-Ba(1)-O(11)     | 140.81(15) | O(13)#2-Ba(1)-O(7)#4  | 66.49(12)  |
| O(2)#1-Ba(1)-O(8)#3   | 69.07(13)  | O(12)-Ba(1)-O(7)#4    | 164.80(13) |
| O(19)-Ba(1)-O(8)#3    | 68.61(15)  | O(8)#3-Ba(1)-O(7)#4   | 100.99(13) |
| O(13)#2-Ba(1)-O(8)#3  | 156.18(12) | O(11)-Ba(1)-O(7)#4    | 127.98(13) |
| O(12)-Ba(1)-O(8)#3    | 66.48(12)  | O(2)#1-Ba(1)-O(2W)    | 65.67(13)  |
| O(2)#1-Ba(1)-O(11)    | 81.52(13)  | O(19)-Ba(1)-O(2W)     | 132.39(14) |
| O(13)#2-Ba(1)-O(12)   | 121.62(11) | O(13)#2-Ba(1)-O(2W)   | 69.21(12)  |
| O(2)#1-Ba(1)-O(11)#2  | 138.28(13) | O(12)-Ba(1)-O(2W)     | 126.86(12) |
| O(19)-Ba(1)-O(11)#2   | 72.85(14)  | O(8)#3-Ba(1)-O(2W)    | 126.33(13) |
| O(13)#2-Ba(1)-O(11)#2 | 63.65(12)  | O(11)-Ba(1)-O(2W)     | 70.72(13)  |
| O(7)#4-Ba(1)-O(11)#2  | 114.68(12) | O(7)#4-Ba(1)-O(2W)    | 67.10(13)  |
| O(8)#3-Ba(1)-O(11)#2  | 107.99(13) | O(2W)-Ba(1)-O(11)#2   | 124.83(12) |
| O(11)-Ba(1)-O(11)#2   | 68.28(13)  | O(12)-Ba(1)-O(11)#2   | 64.28(11)  |
| O(10)-Ba(2)-O(4)      | 151.27(13) | O(1)-Ba(2)-O(1W)      | 66.04(14)  |
| O(10)-Ba(2)-O(1)      | 99.77(13)  | O(16)#5-Ba(2)-O(1W)   | 145.09(13) |
| O(4)-Ba(2)-O(1)       | 67.43(12)  | O(2W)-Ba(2)-O(1W)     | 142.47(14) |
| O(10)-Ba(2)-O(16)#5   | 140.18(14) | O(10)-Ba(2)-O(12)#2   | 104.15(13) |
| O(4)-Ba(2)-O(16)#5    | 68.51(12)  | O(4)-Ba(2)-O(12)#2    | 68.90(11)  |
| O(1)-Ba(2)-O(16)#5    | 98.37(13)  | O(1)-Ba(2)-O(12)#2    | 126.77(12) |
| O(10)-Ba(2)-O(2W)     | 68.64(14)  | O(16)#5-Ba(2)-O(12)#2 | 92.58(12)  |
| O(4)-Ba(2)-O(2W)      | 139.82(12) | O(2W)-Ba(2)-O(12)#2   | 105.63(12) |
| O(1)-Ba(2)-O(2W)      | 127.36(13) | O(1W)-Ba(2)-O(12)#2   | 75.56(12)  |
| O(16)#5-Ba(2)-O(2W)   | 72.14(13)  | O(10)-Ba(2)-O(13)#2   | 106.36(13) |
| O(10)-Ba(2)-O(1W)     | 74.68(14)  | O(4)-Ba(2)-O(13)#2    | 87.53(11)  |
| O(4)-Ba(2)-O(11)      | 129.37(12) | O(1)-Ba(2)-O(13)#2    | 153.64(12) |
| O(1)-Ba(2)-O(11)      | 137.67(12) | O(16)#5-Ba(2)-O(13)#2 | 63.21(12)  |
| O(16)#5-Ba(2)-O(11)   | 123.64(12) | O(2W)-Ba(2)-O(13)#2   | 67.48(12)  |
| O(2W)-Ba(2)-O(11)     | 68.79(12)  | O(1W)-Ba(2)-O(13)#2   | 117.57(12) |
| O(1W)-Ba(2)-O(11)     | 79.93(12)  | O(12)#2-Ba(2)-O(13)#2 | 42.85(10)  |
| O(12)#2-Ba(2)-O(11)   | 65.06(11)  | O(10)-Ba(2)-O(11)     | 45.02(12)  |
| O(13)#2-Ba(2)-O(11)   | 62.03(11)  |                       |            |

<sup>a</sup>Symmetry transformations used to generate equivalent atoms: For **1**, #1: x, -y+1/2, z+1/2; #2: x, -y+1/2, z-1/2; #3: -x+2, y-1/2, -z-1/2; #4: -x+2, -y, -z; #5: -x+2, y+1/2, -z-1/2. For **2**, #1: -x+3/2, y-1/2, -z-1/2; #2: x+1/2, -y+7/2, z+1/2; #3: x-1/2, -y+7/2, z+1/2; #4: -x+1/2, y-1/2, -z-1/2; #5: -x+1/2, y+1/2, -z-1/2; #6: x-1/2, -y+7/2, z-1/2; #7: -x+3/2, y+1/2, -z-1/2; #8: x+1/2, -y+7/2, z-1/2. For **3**, #1: -x+2, -y+1, -z+1; #2: -x+1, -y+1, -z+1; #3: -x+2, -y+1, -z+2. For **4**, #1: x+1, y, z; #2: -x+3, -y+2, -z+1; #3: -x+2, -y+1, -z; #4: x+1, y, z+1; #5: -x+2, -y+2, -z; #6: x-1, y, z-1; #7: x-1, y, z. For **5**, #1: -x, -y, -z; #2: -x-1, -y, -z; #3: x-1, y-1, z-1; #4: -x, -y, -z+1; #5: x+1, y, z+1; #6: x+1, y+1, z+1; #7: x-1, y, z-1.

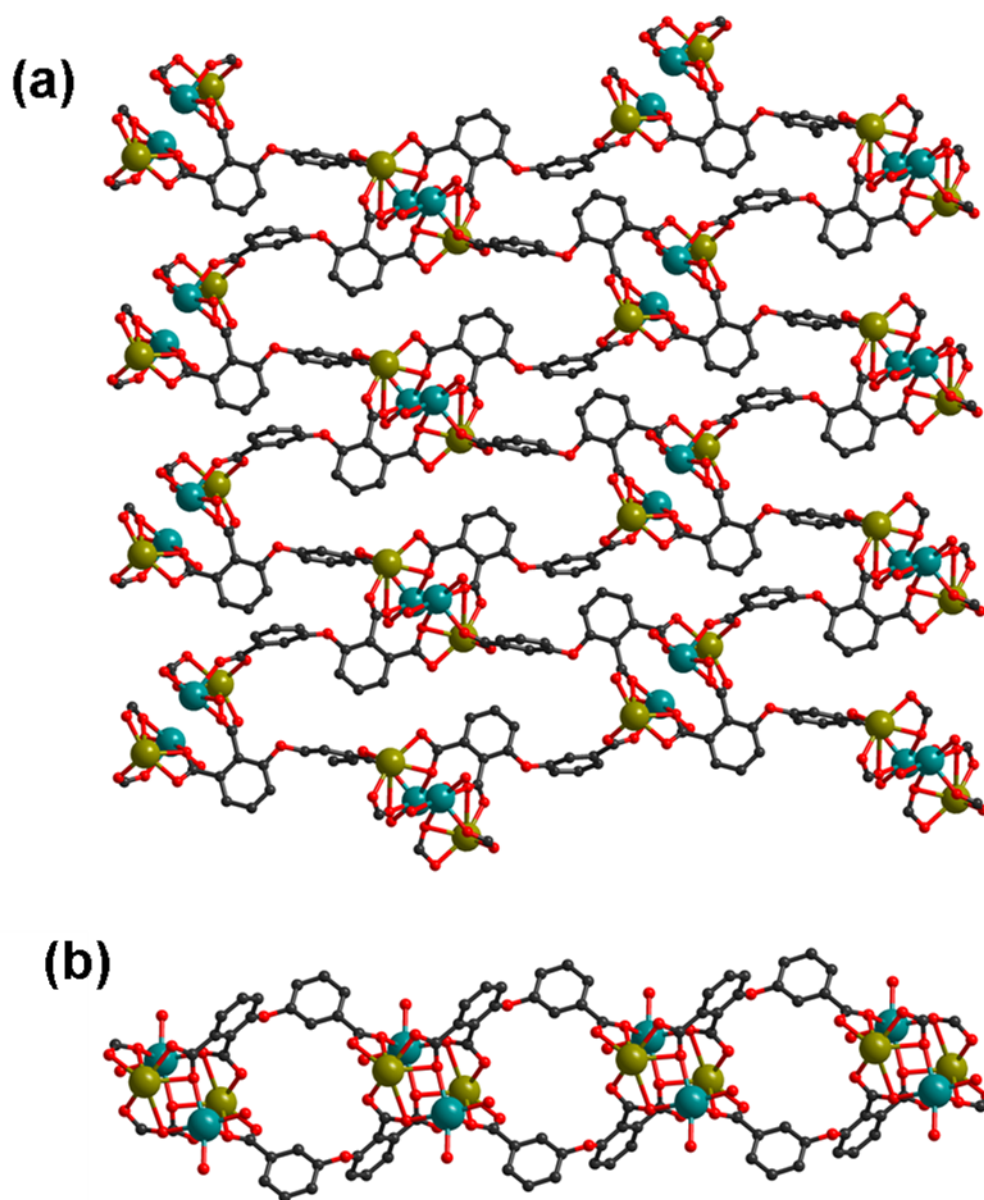

**Fig. S1.** (a) and (b) Ball-and-stick view of simplified 2D layer structure and 1D linear structure of **2**, after removing one of the two meta-positional carboxylate groups at a time.

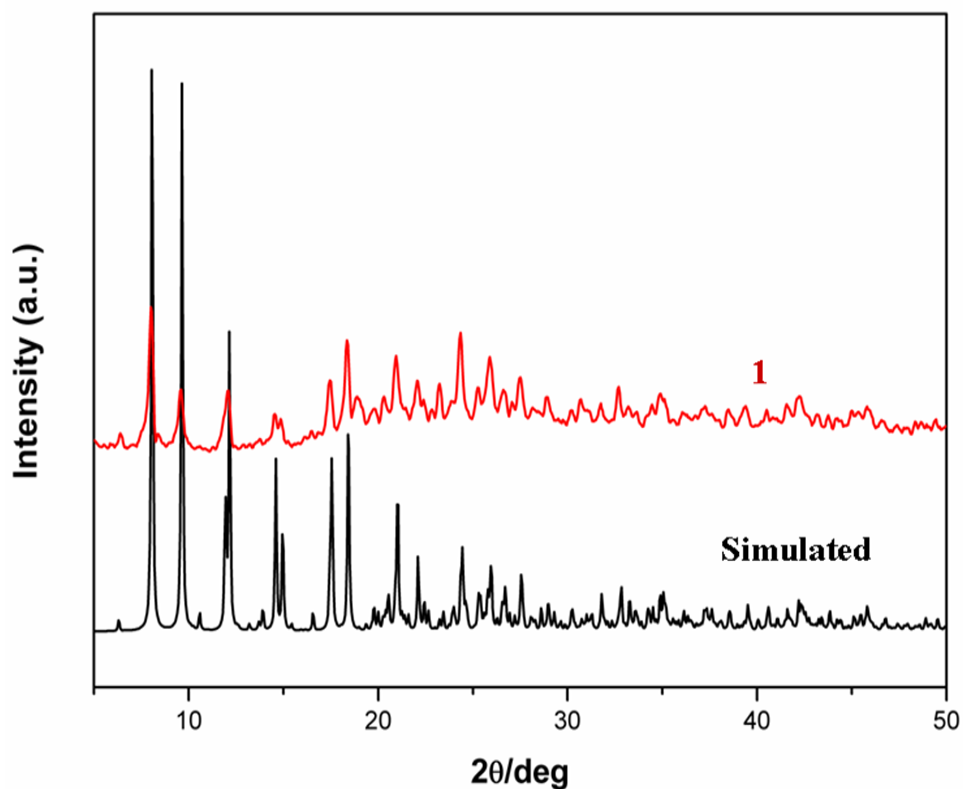

**Fig. S2.** The XRPD patterns for: (red) experimental samples of **1**, and (black) simulated one based on the single-crystal structure of **1**.

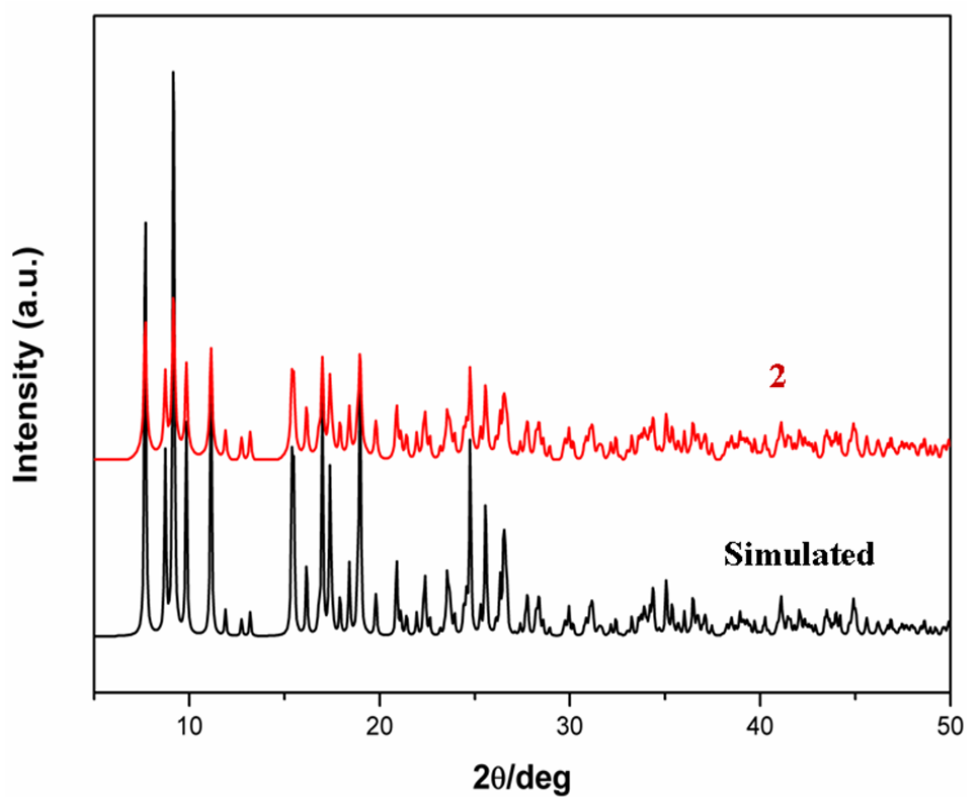

**Fig. S3.** The XRPD patterns for: (red) experimental samples of **2**, and (black) simulated one based on the single-crystal structure of **2**.

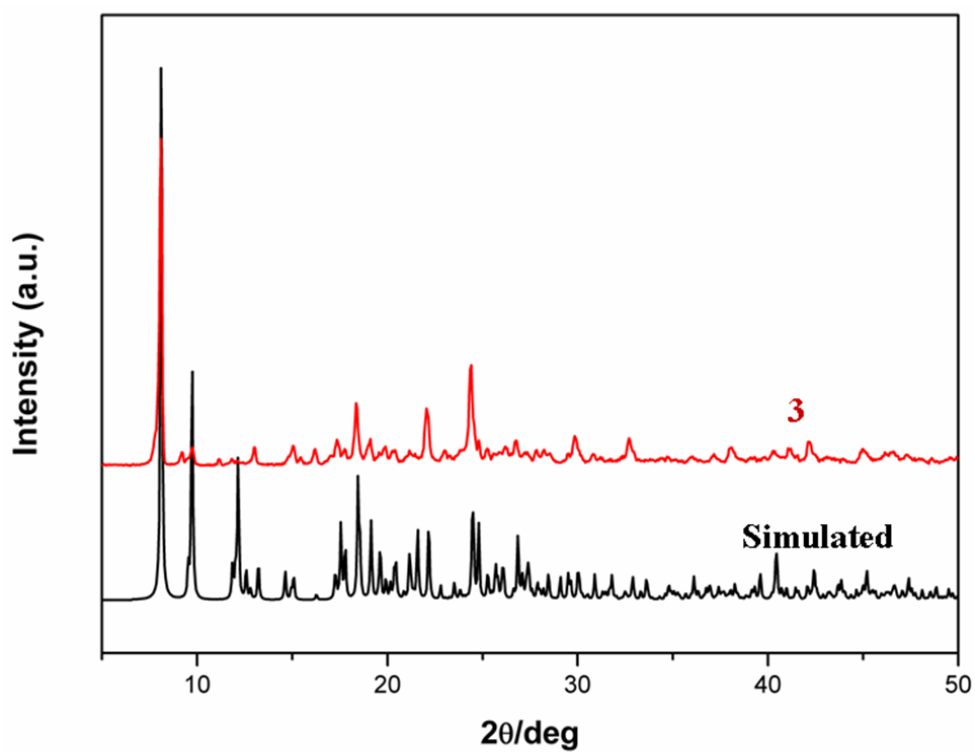

**Fig. S4.** The XRPD patterns for: (red) experimental samples of **3**, and (black) simulated one based on the single-crystal structure of **3**.

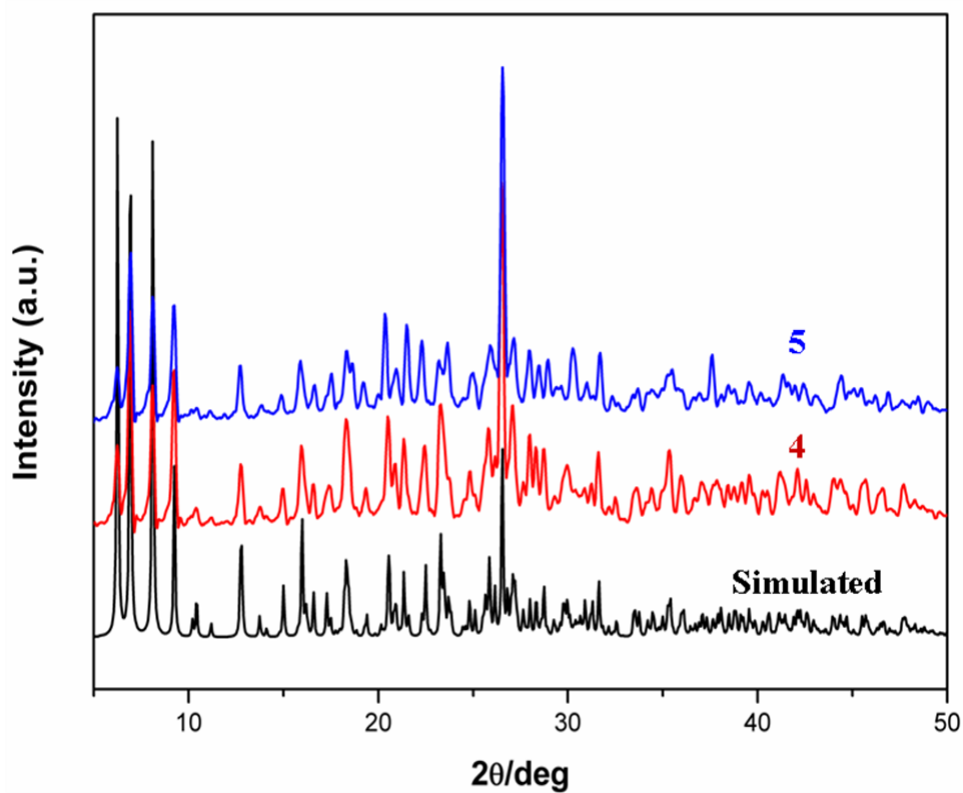

**Fig. S5.** The XRPD patterns for: (red/blue) experimental samples of **4/5**, and (black) simulated one based on the single-crystal structure of **4**.



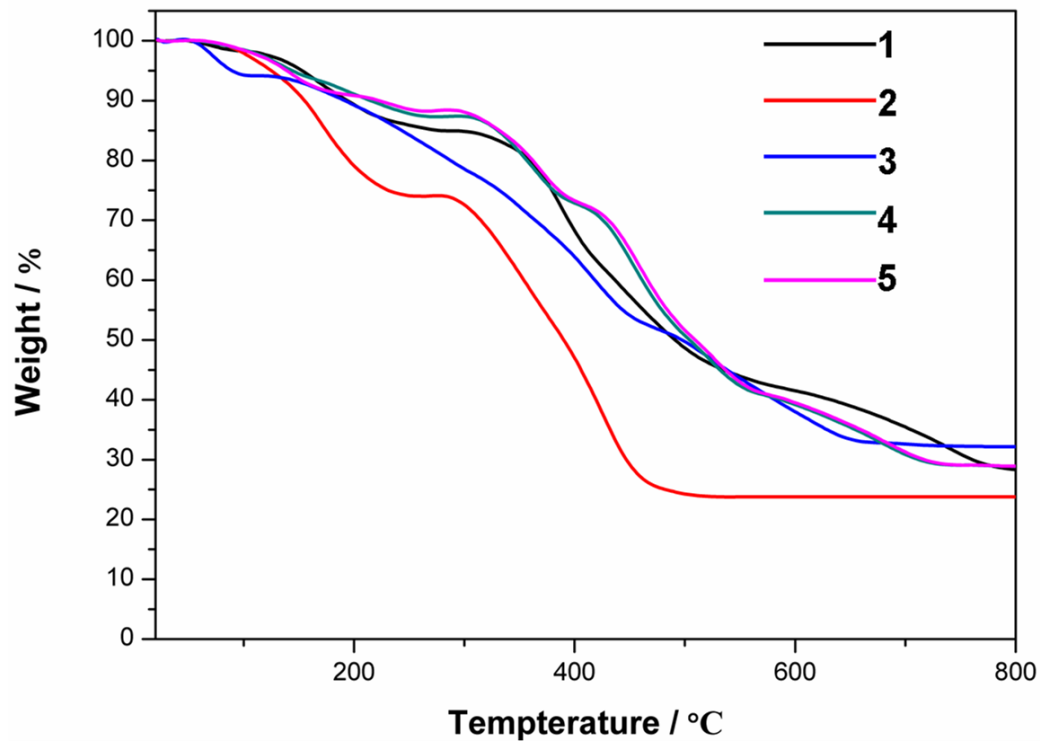

Fig. S6. TGA curves of compounds 1–5.
